# Supplementary material
Source: PubMed Central journal article supplement (PMC4729767)
Supplement: thnov06p0177s1.pdf [file thnov06p0177s1.pdf]

## Supplementary Materials

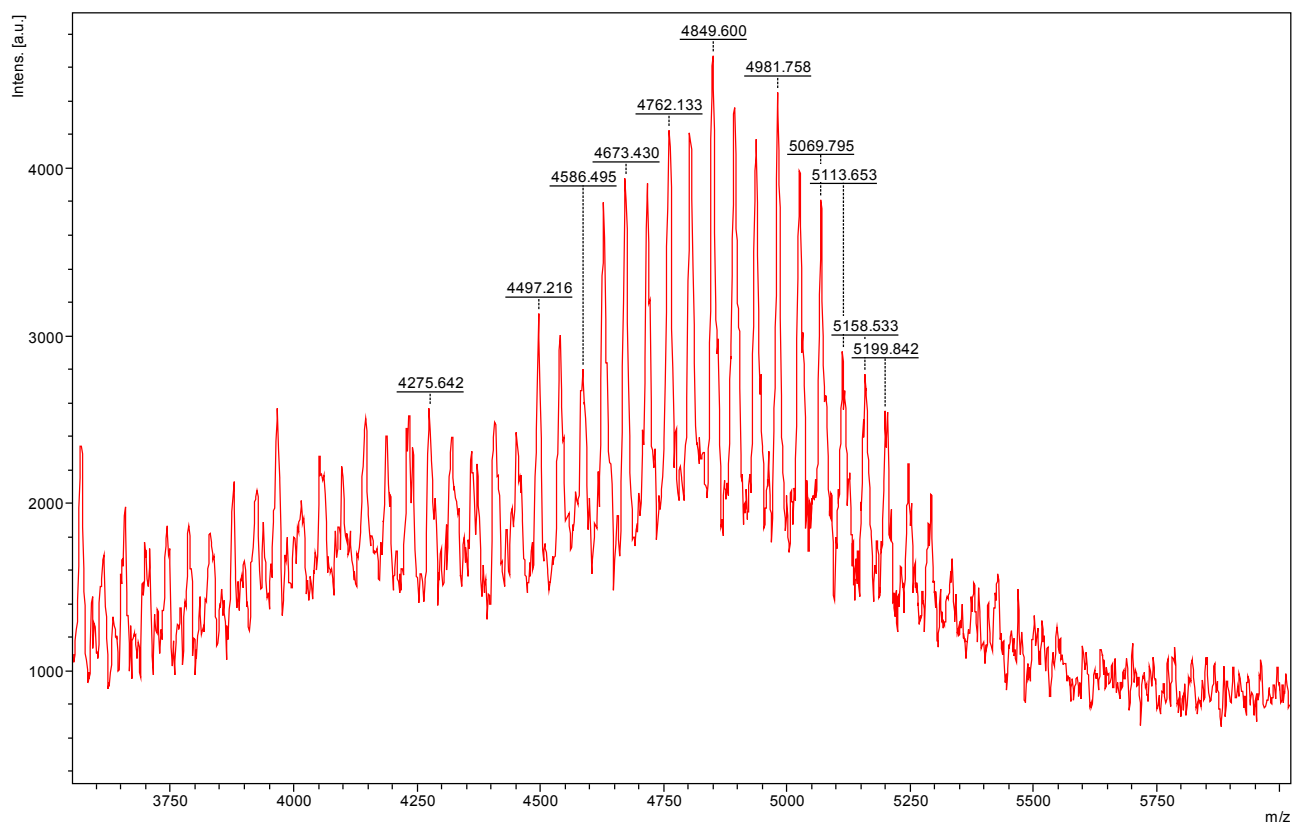

**Fig. S1.** The MALDI-TOF mass spectrum of DSPE-PEG<sub>2000</sub>-R8-dGR.

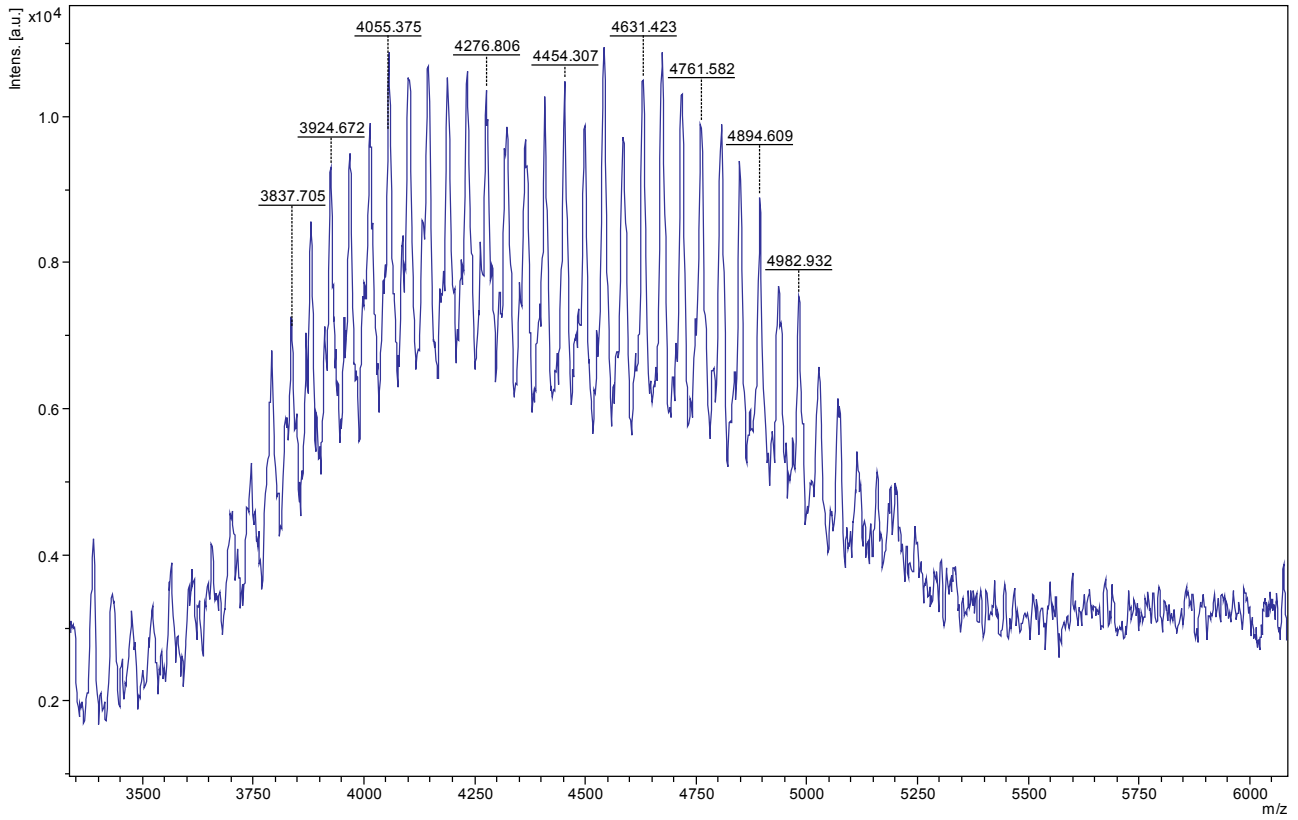

**Fig. S2.** The MALDI-TOF mass spectrum of DSPE-PEG<sub>2000</sub>-R8-RGD.

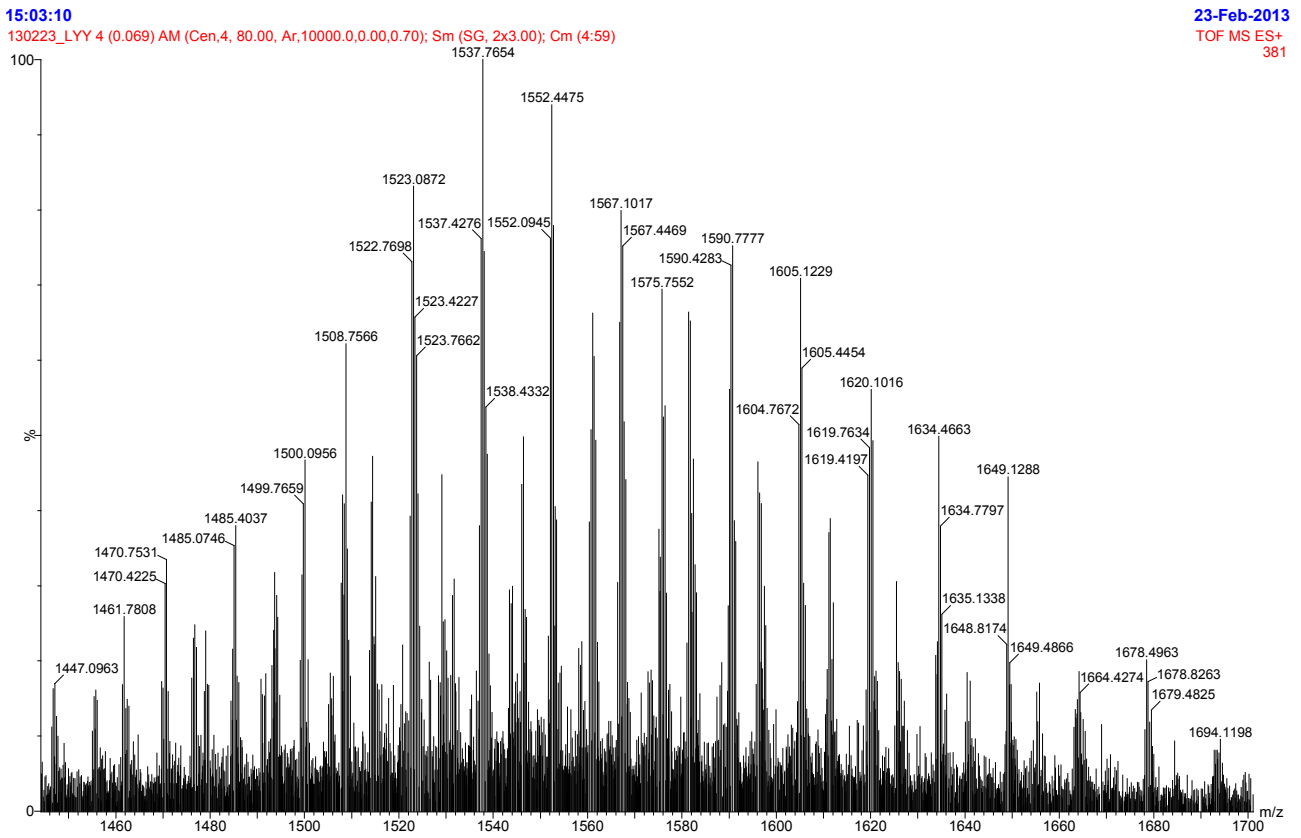

**Fig. S3.** The MALDI-TOF mass spectrum of DSPE-PEG<sub>2000</sub>-R8-EGR.

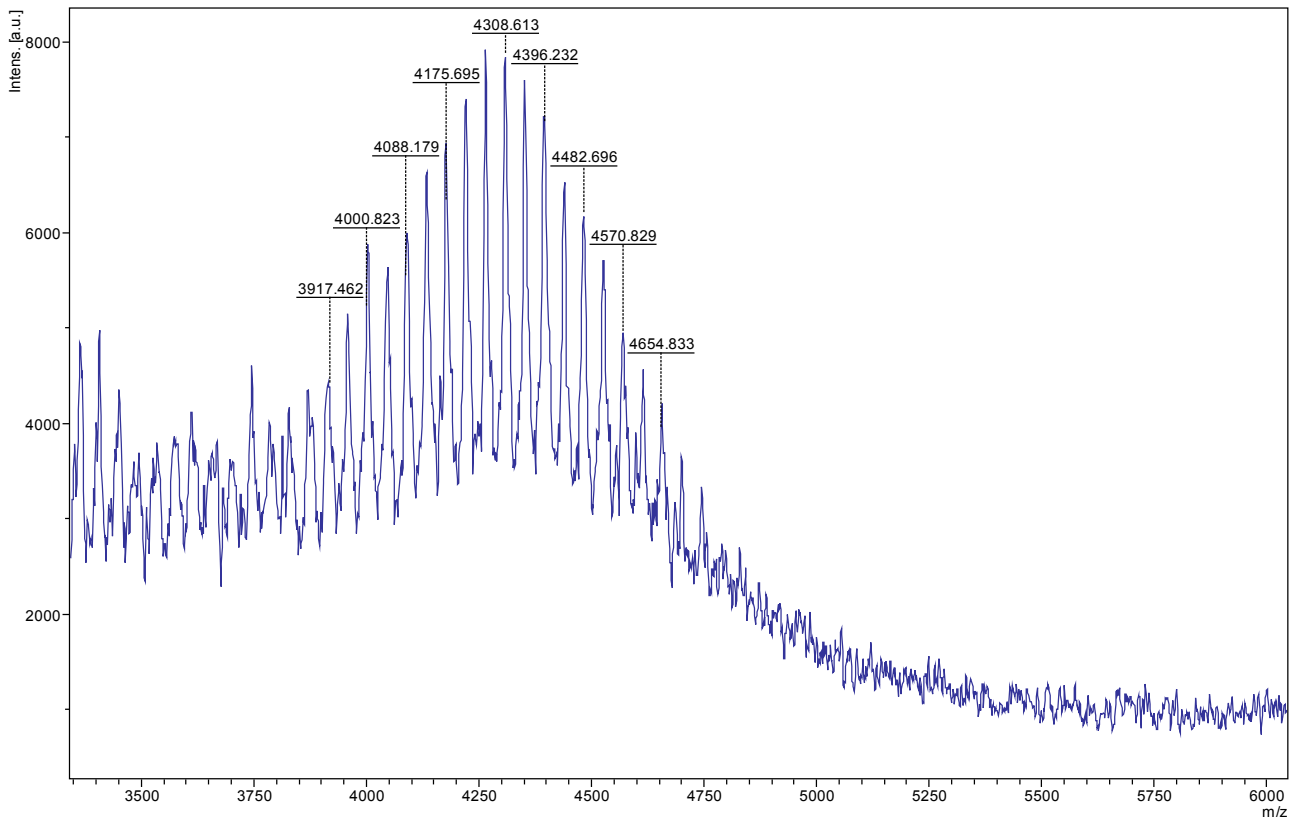

**Fig. S4.** The MALDI-TOF mass spectrum of DSPE-PEG<sub>2000</sub>-R8.

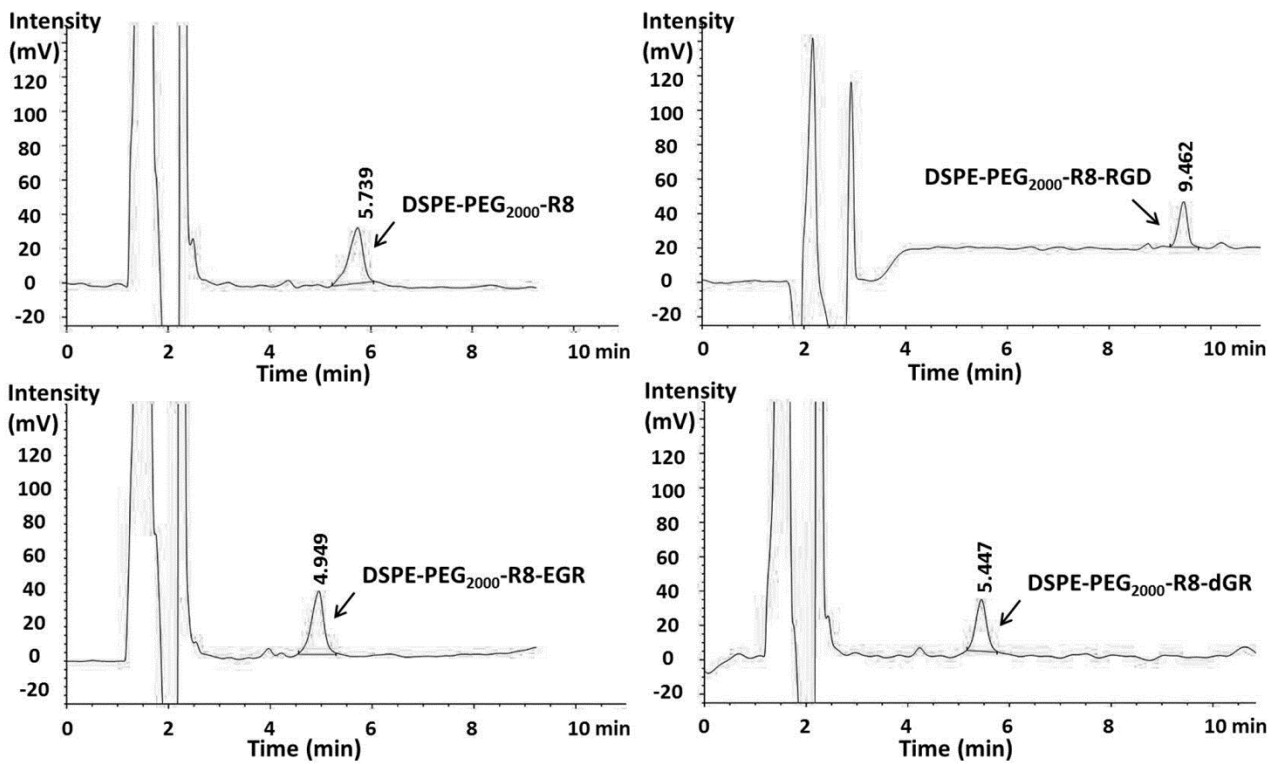

**Fig. S5.** The HPLC spectra of DSPE-PEG<sub>2000</sub>-peptide conjugates.

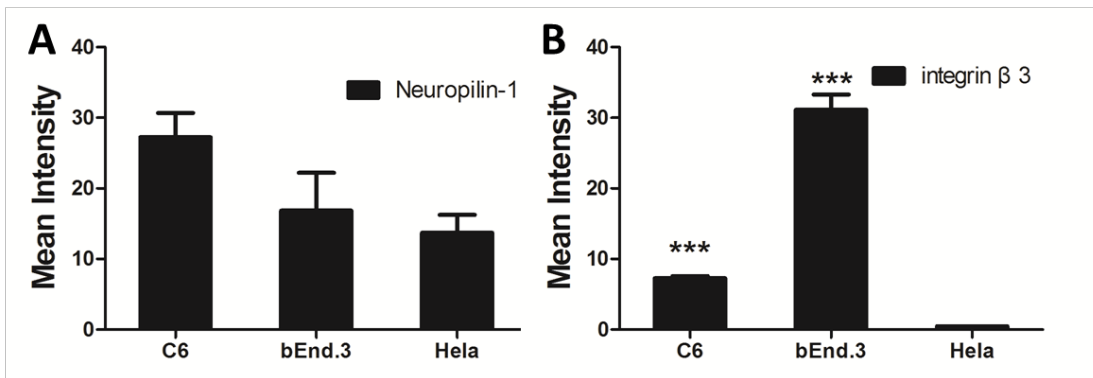

**Fig. S6.** The semi-quantitative results of western blot study of Neuropilin-1 (A) and integrin  $\beta$ 3 (B) expression level on C6, bEnd.3 and HeLa cells. \*\*\* indicates  $p < 0.001$  versus HeLa cells group.

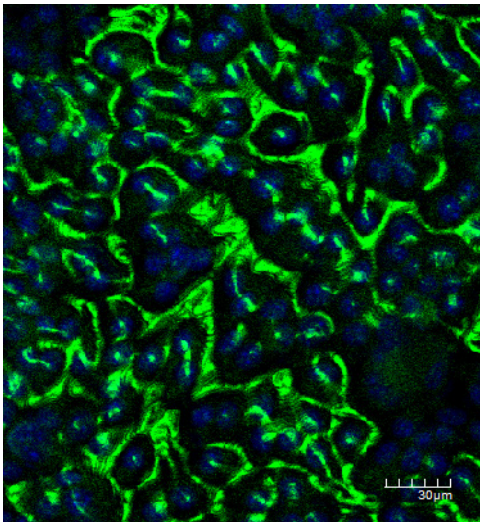

**Fig. S7.** The identification of tight junction on the bEnd.3 monolayer in vitro. The monolayer was stained with anti-ZO-1 antibody (green) and DAPI (blue) was used for nuclei staining.

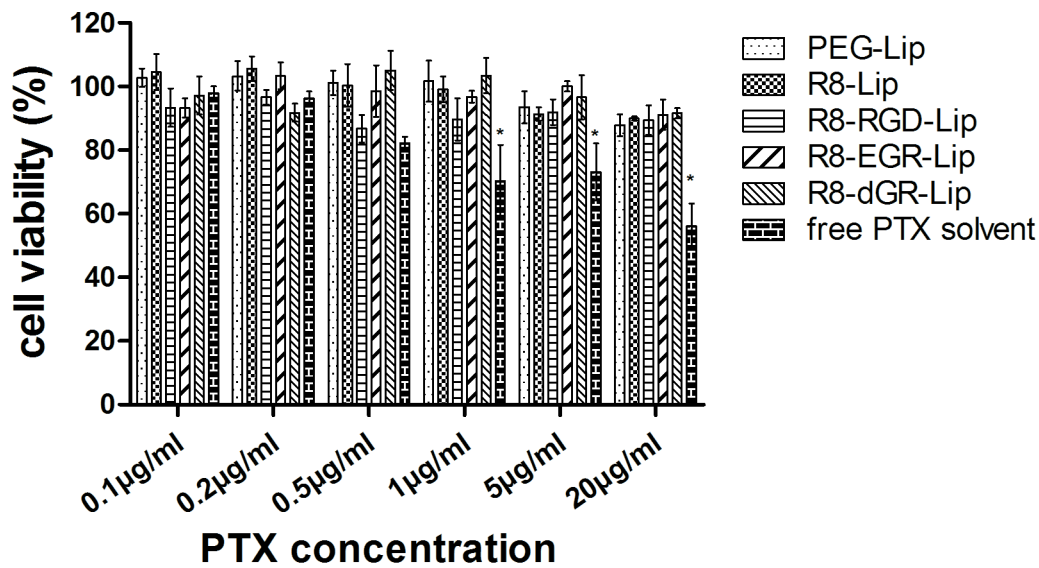

**Fig. S8.** The cytotoxicity study of different and blank vehicles or PTX solvent on C6 cells (n= 3, mean  $\pm$  SD). \* represents  $p < 0.05$  versus other blank liposomal group. Horizontal coordinate represents corresponding PTX concentrations of blank liposomes.

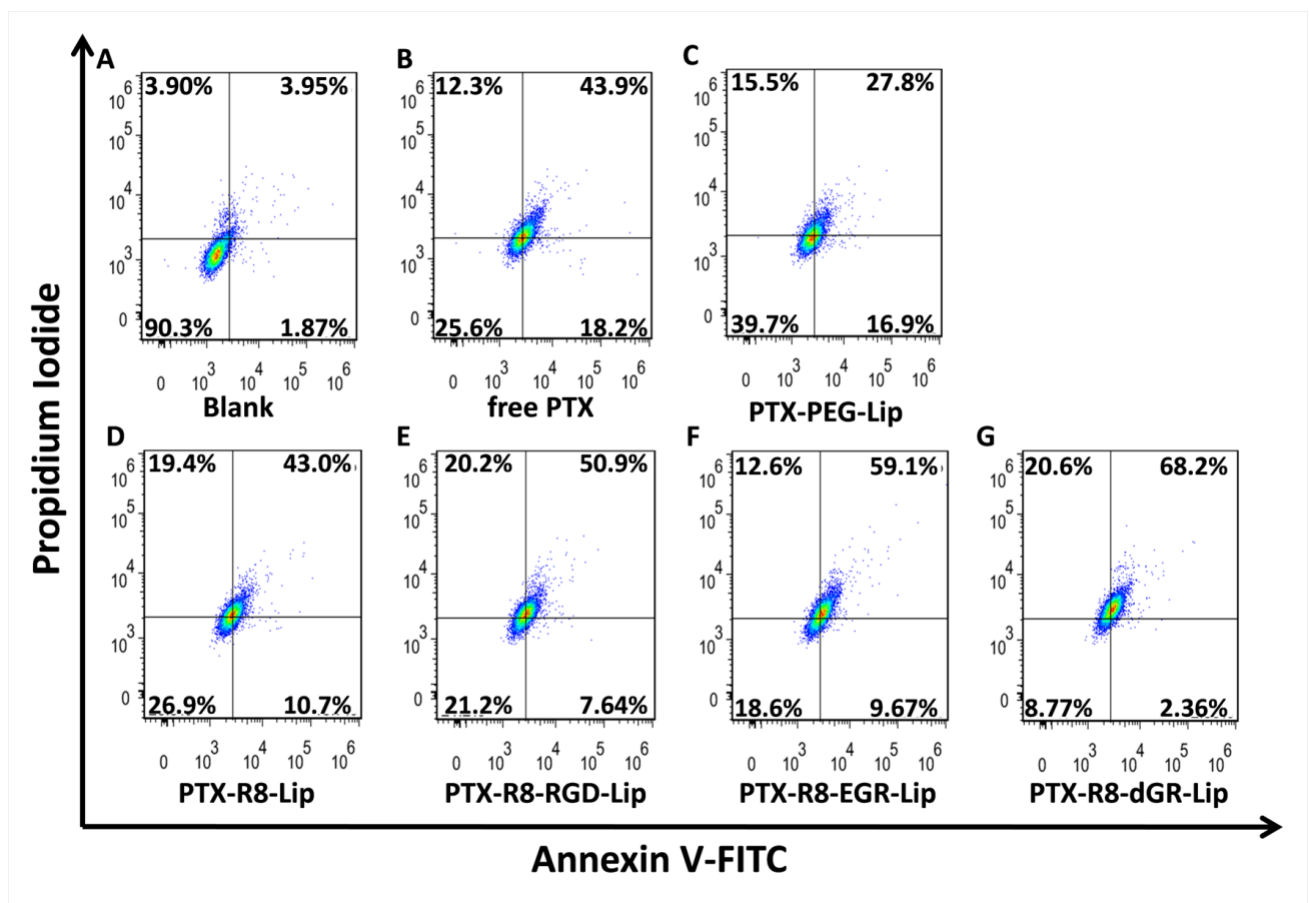

**Fig. S9.** The apoptosis study of C6 cells incubated with free PTX (B), PTX-PEG-Lip (C), PTX-R8-Lip (D), PTX-R8-RGD-Lip (E), PTX-R8-EGR-Lip (F) and PTX-R8-dGR-Lip (G) for 24 h, untreated blank group (A) was used as negative control.

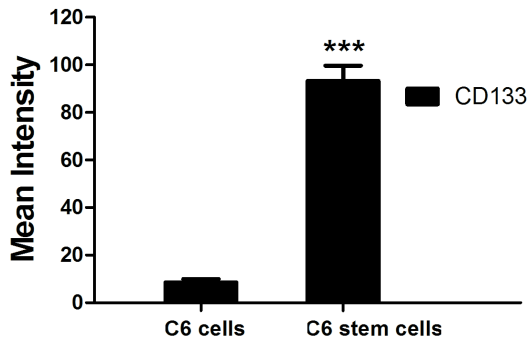

**Fig. S10.** The semi-quantitative results of western blot study of CD133 expression level on C6 cells and C6 stem cells. \*\*\* indicates  $p < 0.001$  versus C6 cells group.

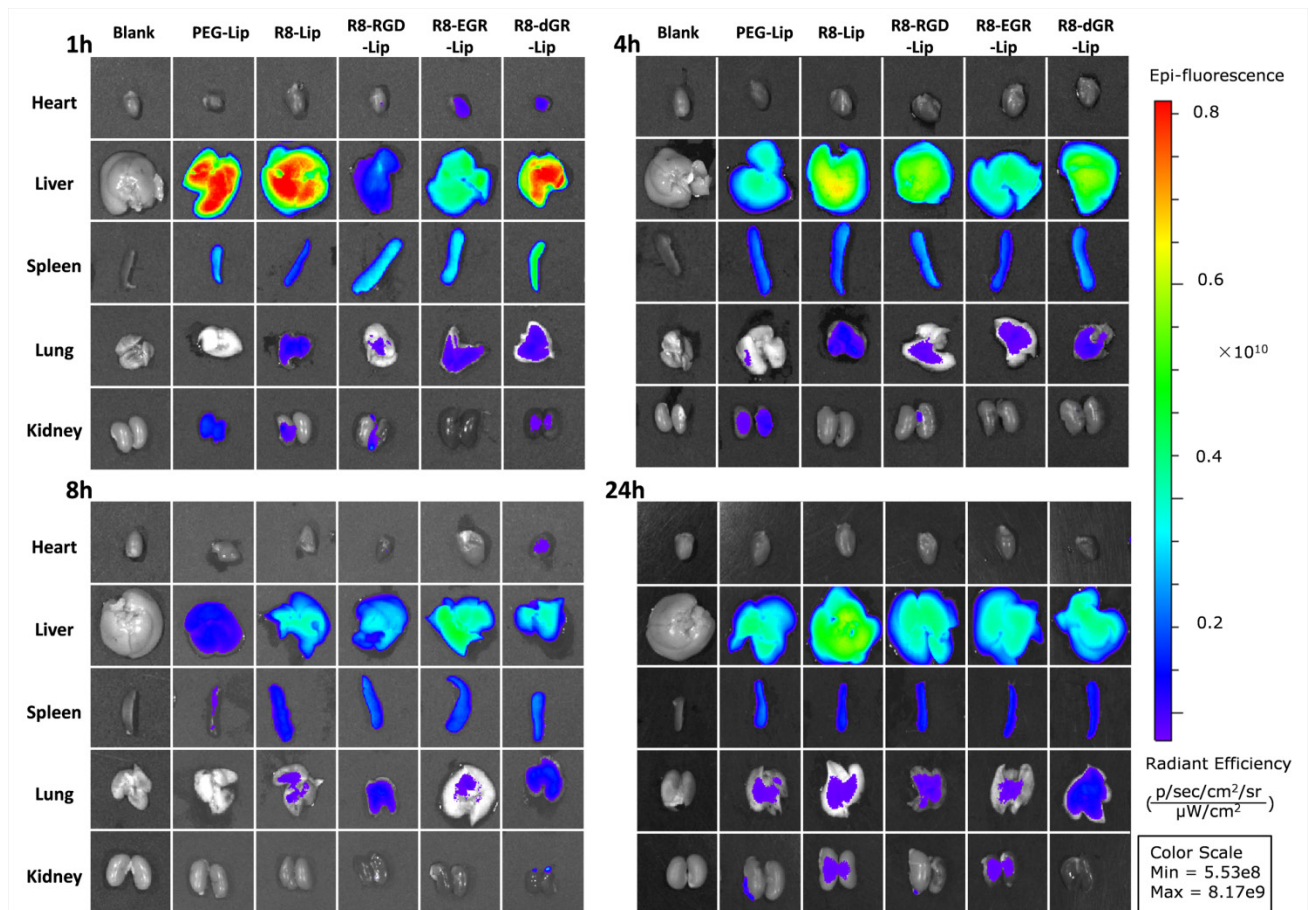

**Fig. S11.** *Ex vivo* images of organs of intracranial C6 glioma bearing mice different time points after systemic administration of DiD-loaded liposomes.

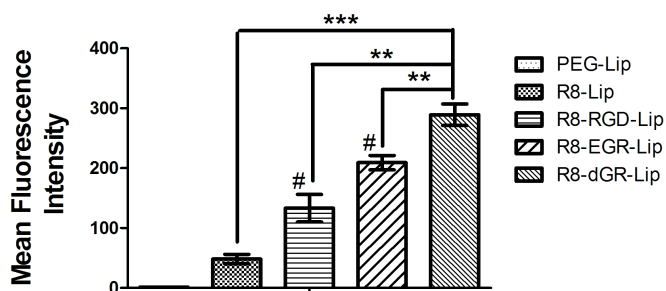

**Fig. S12.** The semi-quantitative results of the confocal images of glioma sections of C6 bearing mice 24 h after systemic administration of DiI-loaded liposomes (n = 3, mean  $\pm$  SD), \*\* and \*\*\* indicate  $p < 0.01$  and  $p < 0.001$  respectively, # indicates  $p < 0.05$  versus R8-Lip group.

**Table S1**

The particle sizes and zeta potentials of different liposomes and the entrapment efficiency of different PTX-Lip (n = 3, mean  $\pm$  SD).

|                | Size (nm)        | PDI               | Zeta potential (mV) | Entrapment efficiency (%) |
|----------------|------------------|-------------------|---------------------|---------------------------|
| PEG-Lip        | 104.8 $\pm$ 3.32 | 0.222 $\pm$ 0.007 | -7.35 $\pm$ 0.25    | --                        |
| R8-Lip         | 106.4 $\pm$ 5.94 | 0.237 $\pm$ 0.025 | -5.10 $\pm$ 0.78    | --                        |
| R8-RGD-Lip     | 103.1 $\pm$ 3.82 | 0.223 $\pm$ 0.006 | -5.28 $\pm$ 0.25    | --                        |
| R8-EGR-Lip     | 102.0 $\pm$ 3.99 | 0.260 $\pm$ 0.055 | -3.78 $\pm$ 0.26    | --                        |
| R8-dGR-Lip     | 107.4 $\pm$ 8.77 | 0.240 $\pm$ 0.049 | -3.26 $\pm$ 0.86    | --                        |
| PTX-PEG-Lip    | 104.4 $\pm$ 2.76 | 0.226 $\pm$ 0.004 | -7.46 $\pm$ 0.13    | 93.96 $\pm$ 4.55          |
| PTX-R8-Lip     | 112.5 $\pm$ 2.62 | 0.248 $\pm$ 0.009 | -4.85 $\pm$ 0.60    | 96.67 $\pm$ 2.43          |
| PTX-R8-RGD-Lip | 108.8 $\pm$ 4.17 | 0.219 $\pm$ 0.012 | -4.86 $\pm$ 0.60    | 93.42 $\pm$ 2.21          |
| PTX-R8-EGR-Lip | 109.6 $\pm$ 6.72 | 0.262 $\pm$ 0.052 | -3.26 $\pm$ 1.00    | 95.32 $\pm$ 3.74          |
| PTX-R8-dGR-Lip | 111.3 $\pm$ 3.32 | 0.254 $\pm$ 0.029 | -2.43 $\pm$ 0.61    | 95.43 $\pm$ 4.19          |

**Table S2**

The IC<sub>50</sub> values of different PTX formulations against C6 cells and C6 stem cells.

|                | IC <sub>50</sub> value ( $\mu$ g/mL)<br>(against C6 cells) | IC <sub>50</sub> value ( $\mu$ g/mL)<br>(against C6 stem cells) |
|----------------|------------------------------------------------------------|-----------------------------------------------------------------|
| PTX-PEG-Lip    | 9.59 $\pm$ 0.76                                            | 31.51 $\pm$ 2.69                                                |
| PTX-R8-Lip     | 6.62 $\pm$ 0.53                                            | 26.69 $\pm$ 1.71                                                |
| PTX-R8-RGD-Lip | 0.92 $\pm$ 0.07                                            | 16.26 $\pm$ 0.93                                                |
| PTX-R8-EGR-Lip | 0.21 $\pm$ 0.04                                            | 9.10 $\pm$ 0.59                                                 |
| PTX-R8-dGR-Lip | 0.08 $\pm$ 0.02                                            | 2.18 $\pm$ 0.44                                                 |
| Free PTX       | 0.90 $\pm$ 0.11                                            | 24.83 $\pm$ 1.51                                                |
